# Supplementary material for: The mechanism of RNA capping by SARS-CoV-2
Source: PubMed Central journal article supplement (PMC9492545; doi:10.1038/s41586-022-05185-z), 2022-08-09
Supplement: 41586_2022_5185_MOESM2_ESM.pdf [file 41586_2022_5185_MOESM2_ESM.pdf]

## Reporting Summary

Nature Portfolio wishes to improve the reproducibility of the work that we publish. This form provides structure for consistency and transparency in reporting. For further information on Nature Portfolio policies, see our [Editorial Policies](#) and the [Editorial Policy Checklist](#).

### Statistics

For all statistical analyses, confirm that the following items are present in the figure legend, table legend, main text, or Methods section.

- |                                     |                                                                                                                                                                                                                                                                                                |
|-------------------------------------|------------------------------------------------------------------------------------------------------------------------------------------------------------------------------------------------------------------------------------------------------------------------------------------------|
| n/a                                 | Confirmed                                                                                                                                                                                                                                                                                      |
| <input type="checkbox"/>            | <input checked="" type="checkbox"/> The exact sample size ( $n$ ) for each experimental group/condition, given as a discrete number and unit of measurement                                                                                                                                    |
| <input type="checkbox"/>            | <input checked="" type="checkbox"/> A statement on whether measurements were taken from distinct samples or whether the same sample was measured repeatedly                                                                                                                                    |
| <input checked="" type="checkbox"/> | <input type="checkbox"/> The statistical test(s) used AND whether they are one- or two-sided<br><i>Only common tests should be described solely by name; describe more complex techniques in the Methods section.</i>                                                                          |
| <input checked="" type="checkbox"/> | <input type="checkbox"/> A description of all covariates tested                                                                                                                                                                                                                                |
| <input checked="" type="checkbox"/> | <input type="checkbox"/> A description of any assumptions or corrections, such as tests of normality and adjustment for multiple comparisons                                                                                                                                                   |
| <input type="checkbox"/>            | <input checked="" type="checkbox"/> A full description of the statistical parameters including central tendency (e.g. means) or other basic estimates (e.g. regression coefficient) AND variation (e.g. standard deviation) or associated estimates of uncertainty (e.g. confidence intervals) |
| <input checked="" type="checkbox"/> | <input type="checkbox"/> For null hypothesis testing, the test statistic (e.g. $F$ , $t$ , $r$ ) with confidence intervals, effect sizes, degrees of freedom and $P$ value noted<br><i>Give <math>P</math> values as exact values whenever suitable.</i>                                       |
| <input checked="" type="checkbox"/> | <input type="checkbox"/> For Bayesian analysis, information on the choice of priors and Markov chain Monte Carlo settings                                                                                                                                                                      |
| <input checked="" type="checkbox"/> | <input type="checkbox"/> For hierarchical and complex designs, identification of the appropriate level for tests and full reporting of outcomes                                                                                                                                                |
| <input checked="" type="checkbox"/> | <input type="checkbox"/> Estimates of effect sizes (e.g. Cohen's $d$ , Pearson's $r$ ), indicating how they were calculated                                                                                                                                                                    |

*Our web collection on [statistics for biologists](#) contains articles on many of the points above.*

### Software and code

Policy information about [availability of computer code](#)

Data collection 1) Cryo-EM: SerialEM 4.0.4 (ref 46).

Data analysis

- 1) NMR: All 2D spectra were processed using NMRPipe 11.0 (ref. 42) and analysed with NMRFAM-SPARKY 1.3 (ref 43).
- 2) Intact mass spectrometry: The acquired mass spectra for the proteins of interest were deconvoluted using BioPharmaView v. 3.0.1 software (Sciex) in order to obtain the molecular weights.
- 3) HPLC/MS: Peak areas were determined and data were further analysed using the Sciex Analyst 1.7.2 software package.
- 4) GraphPad Software 9.4.0, San Diego, California USA, [www.graphpad.com](http://www.graphpad.com)
- 5) Cryo-EM: Relion 3.1 (ref. 47); MotionCor2 1.5 (ref. 48); Gctf 1.06 (ref. 49); crYOLO 1.7 (ref. 50); cryoSPARC 3.2 (ref. 51); Coot 0.9.6 (ref. 52); Phenix 1.20.1-4487 (ref. 53); MolProbity 4.5.1 (ref. 54).
- 6) Bioinformatics: FATCAT 2.0 (ref. 55); ESPrnt 3 (ref. 56)
- 7) Fiji 2.1.0/1.53h (ref. 44)

For manuscripts utilizing custom algorithms or software that are central to the research but not yet described in published literature, software must be made available to editors and reviewers. We strongly encourage code deposition in a community repository (e.g. GitHub). See the Nature Portfolio [guidelines for submitting code & software](#) for further information.

## Data

Policy information about [availability of data](#)

All manuscripts must include a [data availability statement](#). This statement should provide the following information, where applicable:

- Accession codes, unique identifiers, or web links for publicly available datasets
- A description of any restrictions on data availability
- For clinical datasets or third party data, please ensure that the statement adheres to our [policy](#)

Cryo-EM model has been deposited in the Protein Data Bank under accession number 7THM. Cryo-EM density maps have been deposited in the Electron Microscopy Data Bank with accession codes EMD-25898. All other data generated during and/or analysed during the current study are available from the corresponding author on reasonable request.

Additionally, publicly available datasets were used:

*Pseudomonas syringae* SelO protein crystal structure PDBID: 6EAC

Mouse PKA C-alpha crystal structure PDBID: 1ATP

Extended SARS-CoV-2 RTC complex structure with non-native nsp9 PDBID: 7CYQ, EMD: EMD-30504

## Field-specific reporting

Please select the one below that is the best fit for your research. If you are not sure, read the appropriate sections before making your selection.

- Life sciences       Behavioural & social sciences       Ecological, evolutionary & environmental sciences

For a reference copy of the document with all sections, see [nature.com/documents/nr-reporting-summary-flat.pdf](https://www.nature.com/documents/nr-reporting-summary-flat.pdf)

## Life sciences study design

All studies must disclose on these points even when the disclosure is negative.

|                 |                                                                                                                                                                               |
|-----------------|-------------------------------------------------------------------------------------------------------------------------------------------------------------------------------|
| Sample size     | No sample size was predetermined. Sample sizes were chosen according to the standard generally accepted in the field.                                                         |
| Data exclusions | No data were excluded from the analyses.                                                                                                                                      |
| Replication     | Each experiment presented in the paper was repeated at least twice, with similar results. Reported results were consistently replicated across all experiments.               |
| Randomization   | No randomization was used in performing in vitro biochemical experiments. Covariate control is irrelevant for this study. No human or animal subjects were used in the study. |
| Blinding        | Blinding was not used in this study. Due to the experimental setup of the in-vitro experiments, blinding was not possible, or would not provide benefit.                      |

## Reporting for specific materials, systems and methods

We require information from authors about some types of materials, experimental systems and methods used in many studies. Here, indicate whether each material, system or method listed is relevant to your study. If you are not sure if a list item applies to your research, read the appropriate section before selecting a response.

### Materials & experimental systems

| n/a                                 | Involved in the study                                     |
|-------------------------------------|-----------------------------------------------------------|
| <input checked="" type="checkbox"/> | <input type="checkbox"/> Antibodies                       |
| <input type="checkbox"/>            | <input checked="" type="checkbox"/> Eukaryotic cell lines |
| <input checked="" type="checkbox"/> | <input type="checkbox"/> Palaeontology and archaeology    |
| <input checked="" type="checkbox"/> | <input type="checkbox"/> Animals and other organisms      |
| <input checked="" type="checkbox"/> | <input type="checkbox"/> Human research participants      |
| <input checked="" type="checkbox"/> | <input type="checkbox"/> Clinical data                    |
| <input checked="" type="checkbox"/> | <input type="checkbox"/> Dual use research of concern     |

### Methods

| n/a                                 | Involved in the study                           |
|-------------------------------------|-------------------------------------------------|
| <input checked="" type="checkbox"/> | <input type="checkbox"/> ChIP-seq               |
| <input checked="" type="checkbox"/> | <input type="checkbox"/> Flow cytometry         |
| <input checked="" type="checkbox"/> | <input type="checkbox"/> MRI-based neuroimaging |

## Eukaryotic cell lines

Policy information about [cell lines](#)

Cell line source(s) BHK-21J cells were a generous gift from C. Rice, not commercially sourced. VeroE6-C1008 cells were obtained from ATCC.

Authentication

These are not human cells and thus we do not do STR profiling. The ATCC authenticates VeroE6-C1008. BHK-21J were not authenticated.

Mycoplasma contamination

All cell lines are routinely tested for mycoplasma using a sensitive PCR-based assay. The cells in this study tested negative for mycoplasma.

Commonly misidentified lines  
(See [ICLAC](#) register)

No commonly misidentified lines were used.
